# Supplementary material for: Application of principles of exercise training in sub-acute and chronic stroke survivors: a systematic review
Source: Springer Nature journal article supplement (doi:10.1186/s12883-014-0167-2), 2014-08-20
Supplement: MOESM1 [file 9742034]

## Additional file 1: Characteristics of included RCTs

| Aerobic exercise only (n=18) |                                 |                                     |                                                                                                                                                                                                      |                                                                                                                                                                                                                                           |                                                                                                                                                                                           |                                                                                                                                                                                         |
|------------------------------|---------------------------------|-------------------------------------|------------------------------------------------------------------------------------------------------------------------------------------------------------------------------------------------------|-------------------------------------------------------------------------------------------------------------------------------------------------------------------------------------------------------------------------------------------|-------------------------------------------------------------------------------------------------------------------------------------------------------------------------------------------|-----------------------------------------------------------------------------------------------------------------------------------------------------------------------------------------|
|                              | Study ID                        | Participants (Int/Con)              | Intervention (Int)                                                                                                                                                                                   | Control (Con)                                                                                                                                                                                                                             | Primary outcomes (instrument)                                                                                                                                                             | Other outcomes (instrument)                                                                                                                                                             |
| sub-acute stroke survivors   | Barbeau (2003) <sup>[29]</sup>  | n=100<br>(50/50)<br>(LE/LE)         | F: 4x/w for 6w<br>I: ur<br>T: 20min/d<br>T: TAEX with BWS +PT                                                                                                                                        | F: 4x/w for 6w<br>I: ur<br>T: 20min/d<br>T: TAEX without BWS +PT                                                                                                                                                                          | Walking endurance & speed (10MWT) +<br>Motor recovery (STREAM) +<br>Balance (BBS) +                                                                                                       |                                                                                                                                                                                         |
|                              | Kosak (2000) <sup>[30]</sup>    | n=56<br>(22/34)<br>(LE/LE)          | F: 5d/w for duration of inpatient stay<br>I: ur<br>T: 45min/d<br>T: PBWSTT +PT of the same FIT                                                                                                       | F: 5d/w for duration of inpatient stay<br>I: ur<br>T: 45min/d<br>T: ABAW+PT of the same FIT                                                                                                                                               | Walking endurance (distance until fatigue) 0<br>Walking speed (patients' average speed during 2min) 0                                                                                     |                                                                                                                                                                                         |
|                              | Visintin (1998) <sup>[31]</sup> | n=100<br>(50/50)<br>(LE/LE)         | F: 4x/w for 6w<br>I: ur<br>T: 20min/d<br>T: TAEX with BWS +PT                                                                                                                                        | F: 4x/w for 6w<br>I: ur<br>T: 20min/d<br>T: TAEX without BWS +PT                                                                                                                                                                          | Walking endurance (10MWT) +<br>Walking speed (middle 3m of a 10m-walkway) +<br>Motor recovery (STREAM) +<br>Balance (BBS) +                                                               |                                                                                                                                                                                         |
| both                         | Mayo (2013) <sup>[45]</sup>     | n=87<br><br>(43/44)<br><br>(LE/LE)  | F: daily for 12 months<br>I: 50-70% HRR<br>T: 15-30min/d<br>T: home ex. program with mobility ex. & brisk walking involving stationary cycling                                                       | F: daily for 12 months<br>I: 11-15 on Borg Scale (6-20 ratings)<br>T: 15-30min/d<br>T: home ex. program with mobility ex. & brisk walking                                                                                                 | Walking capacity (6minWT) 0                                                                                                                                                               | HRQoL (RAND-36) 0<br>Balance (BBS) 0<br>Physical function (SIS) 0<br>Depression (GDS) 0                                                                                                 |
|                              | Dean (2012) <sup>[42]</sup>     | n=151<br><br>(76/75)<br><br>(LE/UE) | F: at least 3x/w for 40w over 12 months<br>I: nr<br>T: 45-60min/d<br>T: home ex. program and weekly circuit-style group ex. class (progressive balance & strengthening ex., walking, stair climbing) | F: at least 3x/w for 40w over 12 months<br>I: nr<br>T: 45-60min/d<br>T: home ex. program and weekly circuit-style group ex. class to improve UE and cognitive functions (task-related strength & coordination training; sequencing tasks) | Walking capacity (6minWT) +<br>Walking speed (10MWT) +<br>Amount of falls (Fall calendars) 0                                                                                              | Fall risk (SF-PPA) 0<br>Physical activity (steps/d) (Digimax pedometer) 0<br>HRQoL (SF-12) 0<br>Community participation (AAP) +<br>Isometric knee muscle strength 0<br>Activity (TUG) 0 |
| chronic stroke survivors     | Bang (2013) <sup>[40]</sup>     | n=30<br><br>(15/15)<br><br>(LE/LE)  | F: 5x/w for 4 weeks<br>I: ½ of max overground walking speed, then increased<br>T: 30min/d plus 10min video<br>T: gait-related video, then treadmill training                                         | F: 5x/w for 4 weeks<br>I: ½ of max overground walking speed, then increased<br>T: 30min/d plus 10min video<br>T: gait-unrelated video, then treadmill training                                                                            | Walking endurance (6minWT) +<br>Dynamic balance test (TUG) +<br>Gait speed (10MWT) +<br>Walking capacity (max flexed knee angle in the swing phase (Dartfish motion analysis software)) + |                                                                                                                                                                                         |
|                              | Carda (2013) <sup>[41]</sup>    | n=38<br><br>(19/19)<br><br>(LE/LE)  | F: 5x/w for 6w<br>I: 80% of 6minWT speed, then progressively increased<br>T: 45min/d (PT) + 30min/d (treadmill training)                                                                             | F: 5x/w for 6w<br>I: 80% of 6minWT speed, then progressively increased<br>T: 45min/d (PT) + 30min/d (treadmill training)                                                                                                                  | Walking endurance (6minWT) +                                                                                                                                                              | Gait speed (10MWT) +<br>Dynamic balance test (TUG) +                                                                                                                                    |

## Additional file 1: Characteristics of included RCTs

|                          |                               |                               | T: PT + treadmill training with 5% descending slope                                                                                                                                  | T: PT + treadmill training with 5% ascending slope                                                                                                       |                                                                                                                                                                                                                                |                                                                                                                                                                                                |
|--------------------------|-------------------------------|-------------------------------|--------------------------------------------------------------------------------------------------------------------------------------------------------------------------------------|----------------------------------------------------------------------------------------------------------------------------------------------------------|--------------------------------------------------------------------------------------------------------------------------------------------------------------------------------------------------------------------------------|------------------------------------------------------------------------------------------------------------------------------------------------------------------------------------------------|
| chronic stroke survivors | Jin (2013) <sup>[43]</sup>    | n=128<br>(65/63)<br>(LE/LE)   | F: 5x/w for 12w<br>I: 50-70%HRR<br>T: 40min/d<br>T: progressive aerobic cycling                                                                                                      | F: 5x/w for 12w<br>I: 20-30%HRR<br>T: 40min/d<br>T: conventional therapy (stretching and overground walking training)                                    | Cardiovascular fitness (VO <sub>2</sub> peak) +<br>HRR + (cycle ergometer)                                                                                                                                                     | Knee extension muscle strength (isokinetic dynamometer) +<br>Walking endurance (6minWT) +<br>Balance (BBS) 0<br>Spasticity of LE (MASc) 0                                                      |
|                          | Tang (2013) <sup>[46]</sup>   | n=50<br>(25/25)<br>(LE/LE)    | F: 3x/w for 6 months<br>I: progressed from 40-80%HRR<br>T: 60min/d<br>T: high-intensity aerobic ex. (brisk level and inclined overground walking, cycle ergometry)                   | F: 3x/w for 6 months<br>I: < 40% HRR<br>T: 60min/d<br>T: low-intensity non-aerobic balance/flexibility program (stretching, weight bearing, balance ex.) | Cardiovascular fitness (VO <sub>2</sub> peak) 0                                                                                                                                                                                | Arterial stiffness (pulse pressure in mm/Hg) +<br>Ambulatory capacity (6minWT) 0<br>Hemodynamics & cardiac function (echocardiography; 2D-Doppler) +<br>Lipid, glucose & homocysteine levels 0 |
|                          | Globas (2012) <sup>[32]</sup> | n=38<br>(20/18)<br>(LE/LE&UE) | F: 3d/w for 13w<br>I: 40-80% HRR<br>T: 30-50min/d<br>T: Progressive graded, high-intensity TAEX                                                                                      | F: 3d/w for 13w<br>I: 40-80% HRR<br>T: 30-50min/d<br>T: PT, then TAEX-cross                                                                              | Peak exercise capacity (VO <sub>2</sub> peak) +<br>Walking capacity (6minWT) +                                                                                                                                                 | Gait velocity (10MWT) +<br>Leg strength (5 chair-raise) 0<br>Balance (BBS) 0<br>Self-rated mobility (RMI) +<br>HRQoL (SF-12) +                                                                 |
|                          | Jin (2012) <sup>[44]</sup>    | n=133<br>(68/65)<br>(LE/LE)   | F: 5x/w for 8w<br>I: 50-70%HRR<br>T: 40min/d (plus 30min+10min)<br>T: progressive aerobic cycling with lower limb weights on the paretic limb (plus balance exercise and stretching) | F: 5x/w for 8w<br>I: 20-30% HRR<br>T: 40min/d (plus 30min+10min)<br>T: low intensity overground walking (plus balance exercise and stretching)           | Cardiorespiratory fitness (VO <sub>2</sub> peak) +<br>Walking endurance (6minWT) +<br>Mobility (RMI) 0                                                                                                                         | Muscle strength (isokinetic dynamometer) +<br>Balance (BBS) 0<br>Spasticity of LE (MASc) 0                                                                                                     |
|                          | Moore (2010) <sup>[33]</sup>  | n=20<br>(10/10)<br>(LE/LE)    | F: 2-5d/w for 4w for PT and LT<br>I: 0-85% HRR or Borg 17/ LT session<br>T: nr<br>T: Progressive TAEX with BWS<br>4w PT- 4w LT- 4w delay period                                      | F: 2-5d/w for 4w for PT and LT<br>I: 0-85%HRR or Borg 17/ LT session<br>T: nr<br>T: Progressive TAEX with BWS<br>4w PT- 4w delay period- 4w LT           | Self-selected 0 and fastest velocity + (Gait MAT II)<br>Walking endurance (12MWT) 0<br>Physical fitness (O <sub>2</sub> cost +; peak treadmill speed +; VO <sub>2</sub> 0)<br>Mobility (TUG 0; StepWatch +)<br>Balance (BBS) 0 |                                                                                                                                                                                                |
|                          | Quaney (2009) <sup>[34]</sup> | n=38<br>(19/19)<br>(LE/LE&UE) | F: 3d/w for 8w<br>I: 40-70% HRR<br>T: 45min/d<br>T: Progressive, resistive aerobic ex. on a stationary bike                                                                          | F: 3d/w for 8w<br>I: nr<br>T: 45min/d<br>T: Stretching ex. at home                                                                                       | Vo <sub>2</sub> max (metabolic stress test) +<br>Mobility (TUG) +<br>Motor learning (SRTT) for response time + / for random sequence response time 0<br>Balance (BBS) 0<br>Sensorimotor function (FMMA) 0                      |                                                                                                                                                                                                |

## Additional file 1: Characteristics of included RCTs

|                          |                                |                                          |                                                                                                                                                                                                                                                       |                                                                                                                                       |                                                                                                                                                                                                                                                                                                                                                                                                                                                    |
|--------------------------|--------------------------------|------------------------------------------|-------------------------------------------------------------------------------------------------------------------------------------------------------------------------------------------------------------------------------------------------------|---------------------------------------------------------------------------------------------------------------------------------------|----------------------------------------------------------------------------------------------------------------------------------------------------------------------------------------------------------------------------------------------------------------------------------------------------------------------------------------------------------------------------------------------------------------------------------------------------|
|                          |                                |                                          |                                                                                                                                                                                                                                                       |                                                                                                                                       | Conditional learning ability (PGFM) +<br>Rule learning (WCST) <b>0</b><br>Selective attention (Stroop task21) <b>0</b><br>Visual search ability & working memory (Trail-Making Task) <b>0</b>                                                                                                                                                                                                                                                      |
| chronic stroke survivors | Lennon (2008) <sup>[35]</sup>  | n=48<br>(24/24)<br>(LE&UE / LE&UE)       | <b>F:</b> 2d/w for 10w<br><b>I:</b> 50-60% HRR<br><b>T:</b> 30min/d<br><b>T:</b> Cycle ergometer ex.                                                                                                                                                  | <b>F:</b> nr<br><b>I:</b> nr<br><b>T:</b> nr<br><b>T:</b> Usual care (excluding aerobic ex.)                                          | Fitness testing (VO <sub>2</sub> +; RPE <b>0</b> ; peak wattage (Nm) +; CRS +; resting heart rate (bpm) <b>0</b> ; blood pressure <b>0</b> ; BMI <b>0</b> ; fasting lipids <b>0</b> )<br>Daily activities (FAI) <b>0</b><br>Depression (HADS) <b>0</b>                                                                                                                                                                                             |
|                          | Luft (2008) <sup>[36]</sup>    | n=113<br>(37/34)<br><br>(LE/LE)          | <b>F:</b> 3d/w for 6 month<br><b>I:</b> 40-60% HRR<br><b>T:</b> 40min/d<br><b>T:</b> Progressive TAEX<br><i>Subset (N=15) for fMRI testing</i>                                                                                                        | <b>F:</b> 3d/w for 6 month<br><b>I:</b> nr<br><b>T:</b> 40min/d<br><b>T:</b> Stretching<br><i>Subset (N=17) for fMRI testing</i>      | Cardiorespiratory fitness (VO <sub>2</sub> peak) +<br>Gait velocity (10MWT) +<br>Walking ability & endurance (6minWT) <b>0</b><br><i>fMRI +</i>                                                                                                                                                                                                                                                                                                    |
|                          | Macko (2005) <sup>[37]</sup>   | n=61<br>(32/29)<br>(LE/LE)               | <b>F:</b> 3d/w for 6 month<br><b>I:</b> 40-70% HRR<br><b>T:</b> 40min/d<br><b>T:</b> Progressive TAEX                                                                                                                                                 | <b>F:</b> 3d/w for 6 month<br><b>I:</b> Treadmill at 30-40% HRR<br><b>T:</b> 35min / 5min<br><b>T:</b> Stretching / Treadmill walking | Cardiorespiratory fitness (VO <sub>2</sub> peak L/min) +<br>Economy of gait (VO <sub>2</sub> mL/kg/min) <b>0</b><br>Ambulatory performance measures (10MWT <b>0</b> ; 6minWT +)<br>Functional Mobility (RMI <b>0</b> ; WIQ +)                                                                                                                                                                                                                      |
|                          | Peurala (2005) <sup>[38]</sup> | n=45<br><br>(15/15/15)<br><br>(LE/LE/LE) | <b>F:</b> 5d/w for 3w & additional PT 5d/w for 3w for all groups<br><b>I:</b> ur<br><b>T:</b> 20min/d & additional PT 55min/d for all groups<br><b>T:</b> G1: Gait trainer ex. with FES<br>G2: Gait trainer ex. without FES<br>G3: Practicing walking |                                                                                                                                       | Walking speed (10MWT) <b>0</b> & endurance (6minWT) <b>0</b><br>Postural sway (force plate) <b>0</b><br>Spasticity of LE (MASc) + in the ankle (only in G3) but <b>0</b> in the knee and hip (all groups)<br>Muscle force (scale 0-5) + for the ankle dorsiflexors (only in G1) and + for the hip flexors (only in G2) but <b>0</b> for the knee extensors (all groups)<br>Motor ability (MMAS) <b>0</b><br>Functional independence (FIM) <b>0</b> |
|                          | Potempa (1995) <sup>[39]</sup> | n=42<br><br>(19/23)<br><br>(LE/LE&UE)    | <b>F:</b> 3d/w for 10w<br><b>I:</b> 20-94 watts<br><b>T:</b> 30min/d<br><b>T:</b> Progressive cycle ergometer                                                                                                                                         | <b>F:</b> 3d/w for 10w<br><b>I:</b> nr<br><b>T:</b> 30min/d<br><b>T:</b> PROM ex.                                                     | Physical fitness (HR at rest and during ex. (RR interval) <b>0</b> ; blood pressure (sphygmomanometer) for the systolic + but for the diastolic blood pressure during ex. <b>0</b> ; metabolic parameters VO <sub>2</sub> +; VCO <sub>2</sub> +; VE + and RER <b>0</b> (MGCESTS); workload (ergometer) +; exercise time (ergometer) +)<br>Sensorimotor function (FMMA) <b>0</b>                                                                    |

## Additional file 1: Characteristics of included RCTs

| Resistance exercise only (n=8) |                                   |                                  |                                                                                                                                                                                                                        |                                                                                                                                                            |                                                                                                                                                                                                                                                                                                                                                                                                                                                |                                                                                                                                                |
|--------------------------------|-----------------------------------|----------------------------------|------------------------------------------------------------------------------------------------------------------------------------------------------------------------------------------------------------------------|------------------------------------------------------------------------------------------------------------------------------------------------------------|------------------------------------------------------------------------------------------------------------------------------------------------------------------------------------------------------------------------------------------------------------------------------------------------------------------------------------------------------------------------------------------------------------------------------------------------|------------------------------------------------------------------------------------------------------------------------------------------------|
|                                | Study ID                          | Participants (Int/Con)           | Intervention (Int)                                                                                                                                                                                                     | Control (Con)                                                                                                                                              | Primary outcomes (instrument)                                                                                                                                                                                                                                                                                                                                                                                                                  | Other outcomes (instrument)                                                                                                                    |
| chronic stroke survivors       | Clark (2013) <sup>[52]</sup>      | n=35<br>(18/17)<br>(LE/LE)       | <b>F:</b> 3x/w for 5w (plus 3w)<br><b>I:</b> 3-4x 10 reps (nr)<br><b>T:</b> 90min/d (90min/d)<br><b>T:</b> ECC-PRT of the paretic leg (followed by PBWSTT)                                                             | <b>F:</b> 3x/w for 5w (plus 3w)<br><b>I:</b> 3-4x 10 reps (nr)<br><b>T:</b> 90min/d (90min/d)<br><b>T:</b> CON-PRT of the paretic leg (followed by PBWSTT) | CON <b>0</b> and ECC <b>0</b> muscle strength quadriceps (isokinetic dynamometer)<br>Muscle activity of the (RF+VM) <b>+</b> , (ST+BF) <b>0</b> (EMG)<br>Walking speed (motion analysis system) <b>0</b>                                                                                                                                                                                                                                       |                                                                                                                                                |
|                                | Lee (2013) <sup>[53]</sup>        | n=33<br>(11/11/11)<br>(LE/LE/nr) | <b>F:</b> 5x/w for 6w<br><b>I:</b> 3 sets of 70% of 1RM<br><b>T:</b> ur<br><b>T:</b> G1: PRT with CKC ex. on a leg press<br>G2: PRT with OKC ex. on a leg press<br>G3: routine activities, no regular exercise program |                                                                                                                                                            | LE muscle activity (in %) of the RF <b>+</b> , BF <b>+</b> , GC <b>+</b> <b>+</b> and TA <b>+</b> <b>+</b> (EMG)<br>Balance (Good Balance System platform: (A-P) <b>+</b> <b>+</b> & (M-L) <b>+</b> <b>+</b> sway velocities (mm/s))<br><br><b>+ (more significant changes in favor of G1 in post hoc analysis)</b>                                                                                                                            |                                                                                                                                                |
|                                | Waldman (2013) <sup>[54]</sup>    | n=24<br>(12/12)<br>(LE/LE)       | <b>F:</b> 3x/w for 6w<br><b>I:</b> nr<br><b>T:</b> 60min/d<br><b>T:</b> active movement training for strengthening ankle muscles plus passive stretching for ROM therapy through a portable robotic device             | <b>F:</b> 3x/w for 6w<br><b>I:</b> nr<br><b>T:</b> 60min/d<br><b>T:</b> stretching plantar flexors and AROM exercises for ankle mobility and strength      | Isometric ankle muscle strength (DF <b>+</b> & PF <b>0</b> ) / ankle AROM (DF <b>0</b> & PF <b>0</b> ) and PROM (DF <b>+</b> ) (robotic device)<br>LE muscle endurance (6minWT) <b>0</b><br>LE movement (STREAM) <b>+</b><br>Gait evaluations (F-SCAN; in-shoe plantar pressure mapping system) <b>+</b><br>Balance ability (BBS) <b>0</b><br>Plantar flexor spasticity (MASc) <b>+</b>                                                        |                                                                                                                                                |
|                                | Flansbjerg (2008) <sup>[47]</sup> | n=24<br>(15/9)<br>(LE/LE&UE)     | <b>F:</b> 2d/w for 10w<br><b>I:</b> 6-8 reps in 2 sets, 80% 1RM<br><b>T:</b> 90min/d with 6min PRT<br><b>T:</b> PRT of the knee muscles                                                                                | <b>F:</b> nr<br><b>I:</b> nr<br><b>T:</b> nr<br><b>T:</b> Usual daily activities                                                                           | Muscle strength (dynamic <b>+</b> & isokinetic <b>+</b> ; MASc <b>0</b> )<br>Gait performance (TUG <b>+</b> ; Fast gait speed <b>0</b> ; 6minWT <b>0</b> )<br>Perceived participation (SIS) <b>+</b>                                                                                                                                                                                                                                           |                                                                                                                                                |
|                                | Yang (2006) <sup>[48]</sup>       | n=48<br>(24/24)<br>(LE/LE&UE)    | <b>F:</b> 3d/w for 4w<br><b>I:</b> ur<br><b>T:</b> 30min/d<br><b>T:</b> ex. for LE strengthening (circuit class)                                                                                                       | <b>F:</b> nr<br><b>I:</b> nr<br><b>T:</b> nr<br><b>T:</b> Usual care                                                                                       | LE muscle strength (dynamometer) <b>+</b><br>LE muscle endurance (6minWT) <b>+</b><br>Gait velocity, cadence & stride length (GAITRite) <b>+</b><br>Mobility (TUG) <b>+</b><br>Balance (step test) <b>+</b>                                                                                                                                                                                                                                    |                                                                                                                                                |
|                                | Ouellette (2004) <sup>[49]</sup>  | n=42<br>(21/21)<br>(LE/LE&UE)    | <b>F:</b> 3d/w for 12w<br><b>I:</b> 3 sets, 8-10 reps/set, 70% 1RM<br><b>T:</b> nr<br><b>T:</b> Supervised high-intensity PRT with 4 ex.                                                                               | <b>F:</b> 3d/w for 12w<br><b>I:</b> nr<br><b>T:</b> nr<br><b>T:</b> Bilateral ROM ex. + UE stretching                                                      | LE muscle strength (1RM Leg Press <b>+</b> ; knee extension ex. <b>+</b> ; DF-ex. in the paretic <b>+</b> & in the non-paretic limb <b>0</b> ; PF-ex. <b>+</b> ; peak muscle power Leg Press <b>0</b> ; knee extension ex. <b>+</b> )<br>LE muscle endurance (6minWT) <b>0</b><br>Stair-climb time (10-stair flight) <b>0</b><br>Repeated chair-rise time <b>0</b><br>Gait velocity (10MWT) <b>0</b><br>Function & disability (LLFDI) <b>0</b> | Self-perceived ability for 5 functional tasks (ESES) <b>0</b><br>Self-reported functional outcome (PF10) <b>0</b><br>Depression (GDS) <b>0</b> |

### Additional file 1: Characteristics of included RCTs

|                          |                             |                                |                                                                                                                                            |                                                                                                                            |                                                                                                                                                                        |
|--------------------------|-----------------------------|--------------------------------|--------------------------------------------------------------------------------------------------------------------------------------------|----------------------------------------------------------------------------------------------------------------------------|------------------------------------------------------------------------------------------------------------------------------------------------------------------------|
| chronic stroke survivors | Kim (2001) <sup>[50]</sup>  | n=20<br>(10/10)<br><br>(LE/LE) | <b>F:</b> 3d/w for 6w<br><b>I:</b> 3 sets, 10 reps/set at RM<br><b>T:</b> 45min/d<br><b>T:</b> max concentric isokinetic strength training | <b>F:</b> 3d/w for 6w<br><b>I:</b> nr<br><b>T:</b> 45min/d<br><b>T:</b> PROM of paretic LE                                 | Isokinetic strength of LE (dynamometer) <b>0</b><br>Walking speed (level-walking and stair-walking) <b>0</b><br>HRQoL (SF-36) <b>0</b><br>Mental health (MSC) <b>0</b> |
|                          | Dean (2000) <sup>[51]</sup> | n=9<br>(5/4)<br><br>(LE/UE)    | <b>F:</b> 3d/w for 4w<br><b>I:</b> nr<br><b>T:</b> 60min/d<br><b>T:</b> Task-related strength training (circuit of 10 workstations)        | <b>F:</b> 3d/w for 4w<br><b>I:</b> nr<br><b>T:</b> 60min/d<br><b>T:</b> Practiced UE tasks (circuit of workstations & ex.) | Walking speed (10MWT) <b>+</b> and endurance (6minWT) <b>+</b><br>LE function; force production (TUG) <b>+</b><br>Balance (step test) <b>+</b>                         |

## Additional file 1: Characteristics of included RCTs

| Aerobic and resistance exercises (n=11) |                                |                                             |                                                                                                                                                                                                                                                                                      |                                                                                                    |                                                                                                                                                                                                                                                                                   |                                                                                                                                                                                                                                                          |
|-----------------------------------------|--------------------------------|---------------------------------------------|--------------------------------------------------------------------------------------------------------------------------------------------------------------------------------------------------------------------------------------------------------------------------------------|----------------------------------------------------------------------------------------------------|-----------------------------------------------------------------------------------------------------------------------------------------------------------------------------------------------------------------------------------------------------------------------------------|----------------------------------------------------------------------------------------------------------------------------------------------------------------------------------------------------------------------------------------------------------|
|                                         | Study ID                       | Participants (Int/Con)                      | Intervention (Int)                                                                                                                                                                                                                                                                   | Control (Con)                                                                                      | Primary outcomes (instrument)                                                                                                                                                                                                                                                     | Other outcomes (instrument)                                                                                                                                                                                                                              |
| sub-acute stroke survivors              | Duncan (2003) <sup>[55]</sup>  | n=92<br>(44/48)<br><br>(LE&UE / LE&UE)      | <b>F:</b> 3d/w for 12w<br><b>I:</b> nr<br><b>T:</b> 90min/d<br><b>T:</b> Supervised in-home strength, endurance and balance program                                                                                                                                                  | <b>F:</b> nr<br><b>I:</b> nr<br><b>T:</b> nr<br><b>T:</b> Usual care + completing intervention log | Muscular strength (dynamometer and ankle & knee isometric peak torque) <b>0</b><br>Cardiorespiratory endurance (peak aerobic capacity) +<br>UE-function (WMFT) <b>0</b><br>LE & UE motor control (Fugl-Meyer) <b>0</b><br>Mobility (10MWT <b>0</b> , 6minWT +)<br>Balance (BBS) + |                                                                                                                                                                                                                                                          |
|                                         | Duncan (1998) <sup>[56]</sup>  | n=20<br>(10/10)<br><br>(LE&UE / LE&UE)      | <b>F:</b> 3d/w for 12w<br><b>I:</b> nr<br><b>T:</b> 90min/d<br><b>T:</b> Supervised in-home strength, endurance and balance program                                                                                                                                                  | <b>F:</b> nr<br><b>I:</b> nr<br><b>T:</b> nr<br><b>T:</b> Usual care + completing intervention log | Gait speed (10MWT) + & walking distance (6minWT) <b>0</b><br>Motor recovery LE + and UE <b>0</b> (FMMA)<br>ADL (BI of ADL) <b>0</b> and (LS-IADL) <b>0</b><br>HRQoL (SF-36) <b>0</b><br>Balance (BBS) <b>0</b><br>Upper extremity function (Jebsen test) <b>0</b>                 |                                                                                                                                                                                                                                                          |
| both                                    | Salbach (2004) <sup>[57]</sup> | n= 91<br>(44/47)<br><br>(LE/UE)             | <b>F:</b> 3d/w for 6w<br><b>I:</b> nr<br><b>T:</b> 60min/d<br><b>T:</b> 10 functional tasks to strengthen the LE & to improve walking balance, speed & distance                                                                                                                      | <b>F:</b> 3d/w for 6w<br><b>I:</b> nr<br><b>T:</b> nr<br><b>T:</b> Seated UE activities            | Walking capacity (6minWT) +                                                                                                                                                                                                                                                       | Comfortable and max pace (5MWT) +<br>Mobility (TUG) <b>0</b><br>Balance (BBS) <b>0</b>                                                                                                                                                                   |
| chronic stroke survivors                | Lee (2010) <sup>[58]</sup>     | n=48<br>(12/12/12/12)<br><br>(LE/LE/ LE/LE) | <b>F:</b> 3d/w for 12w for all groups<br><b>I:</b> PRT: 2 sets, 8 reps/set, 50-80% 1RM<br>Cycling: 50-80% HRR<br><b>T:</b> 30min/d for all groups<br><b>T:</b> G1: aerobic cycling + sham PRT<br>G2: sham cycling + PRT<br>G3: aerobic cycling + PRT<br>G4: sham cycling + sham PRT  |                                                                                                    | Max muscle force (pneumatic resistance machines; fixed dynamometer) + <b>0</b><br>Max muscle power (peak force, velocity) + <b>0</b><br>Muscle endurance (as many repetitions as possible) + <b>0</b><br><br>Strength/PRT<br>Aerobic/cycling                                      |                                                                                                                                                                                                                                                          |
|                                         | Lee (2008) <sup>[59]</sup>     | n=52<br>(13/13/14/12)<br><br>(LE/LE/ LE/LE) | <b>F:</b> 3d/w for 12w for all groups<br><b>I:</b> PRT: 2 sets, 8 reps/set, 50-80% 1 RM<br>Cycling: 50-80% HRR<br><b>T:</b> 30min/d for all groups<br><b>T:</b> G1: aerobic cycling + sham PRT<br>G2: sham cycling + PRT<br>G3: aerobic cycling + PRT<br>G4: sham cycling + sham PRT |                                                                                                    | Mobility (10MWT, 6minWT) <b>0</b><br>Stair climbing test & power + <b>0</b><br><br>Strength/PRT<br>Aerobic/cycling                                                                                                                                                                | Max muscle force (pneumatic resistance machines; fixed dynamometer) + <b>0</b><br>Muscle endurance (as many repetitions as possible) + <b>0</b><br>Cardiorespiratory fitness +<br>(V <sub>02</sub> peak, PO peak +, peak HR)<br>HRQoL (SF-36) + <b>0</b> |
|                                         | Pang (2008) <sup>[60]</sup>    | n=63<br>(32/31)                             | <b>F:</b> 3d/w for 19w<br><b>I:</b> ur<br><b>T:</b> 60min/d<br><b>T:</b> FAME: cardiorespiratory                                                                                                                                                                                     | <b>F:</b> 3d/w for 19w<br><b>I:</b> nr<br><b>T:</b> 1h/d<br><b>T:</b> Seated UE program, no        | Walking capacity (6minWT) +<br>V <sub>02</sub> max (Excalibur cycle ergometer) +<br>Muscle strength (dynamometer) in the paretic + & in the non-paretic knee <b>0</b>                                                                                                             |                                                                                                                                                                                                                                                          |

## Additional file 1: Characteristics of included RCTs

|                          |                                         | (LE/UE)                                | fitness, mobility, balance, LE strengthening                                                                                                                                                                                                           | aerobic ex., no LE strengthening, no balance                                                                                                                         | Balance (ABCS <b>0</b> ; BBS <b>0</b> )                                                                                                                                                                                                                                                                                                                                                                 |
|--------------------------|-----------------------------------------|----------------------------------------|--------------------------------------------------------------------------------------------------------------------------------------------------------------------------------------------------------------------------------------------------------|----------------------------------------------------------------------------------------------------------------------------------------------------------------------|---------------------------------------------------------------------------------------------------------------------------------------------------------------------------------------------------------------------------------------------------------------------------------------------------------------------------------------------------------------------------------------------------------|
| chronic stroke survivors | Mead (2007) <sup>[61]</sup>             | n=66<br>(32/34)<br><br>(LE&UE / LE&UE) | <b>F:</b> 3d/w for 12w<br><b>I:</b> Endurance: at least Borg 13, PRT: 4-15 reps per ex.<br><b>T:</b> 75min/d<br><b>T:</b> Progressive endurance training (cycle ergometer) & PRT                                                                       | <b>F:</b> 3d/w for 12w<br><b>I:</b> nr<br><b>T:</b> 75min/d<br><b>T:</b> Relaxation                                                                                  | Physical fitness (VO <sub>2</sub> mL/kg <b>+</b> ; NPR <b>0</b> )<br>Mobility (RMI <b>0</b> ; reach <b>0</b> ; sit-to-stand <b>0</b> ; elderly mobility score <b>0</b> ; TUG <b>+</b> )<br>ADL (FIM <b>0</b> ; NE-ADL <b>0</b> )<br>HRQoL (SF-36) <b>+</b><br>Depression (HADS) <b>0</b>                                                                                                                |
|                          | Olney (2006) <sup>[62]</sup>            | n=74<br>(38/36)<br><br>(LE/LE)         | <b>F:</b> 3d/w for 10w<br><b>I:</b> ur<br><b>T:</b> 90min/d<br><b>T:</b> Supervised ex. sessions: graded walking and/or cycling program+ strength training                                                                                             | <b>F:</b> 3d/w for 10w<br><b>I:</b> nr<br><b>T:</b> 90min/d<br><b>T:</b> 1w supervised & 9w unsupervised ex. Sessions at home, (same sessions as intervention group) | Walking endurance (6minWT) <b>0</b><br><br>Strength of LE muscles (dynamometer) <b>0</b><br>Oxygen cost (PCI) <b>0</b><br>Activity (HAP) <b>+</b><br>Physical and mental health (SF36) <b>0</b>                                                                                                                                                                                                         |
|                          | Pang (2005) <sup>[63]</sup>             | n=63<br>(32/31)<br><br>(LE/UE)         | <b>F:</b> 3d/w for 19w<br><b>I:</b> ur<br><b>T:</b> 60min/d<br><b>T:</b> FAME: mobility, cardiorespiratory fitness, balance, LE strengthening                                                                                                          | <b>F:</b> 3d/w for 19w<br><b>I:</b> ur<br><b>T:</b> 60min/d<br><b>T:</b> Seated UE program, no aerobic ex., no LE strengthening, no balance                          | VO <sub>2</sub> max (Excalibur cycle ergometer) <b>+</b><br>Walking endurance (6minWT) <b>+</b><br>Muscle strength (dynamometer) in the paretic <b>+</b> & in the non-paretic knee <b>0</b><br>Activity and participation (PASIPD) <b>0</b><br>Femoral neck bone mineral density (dual-energy x-ray absorptiometry) in the paretic <b>+</b> & in the non-paretic leg <b>0</b><br>Balance (BBS) <b>0</b> |
|                          | Carr (2003) <sup>[64]</sup>             | n=40<br>(nr/nr)<br><br>(LE&UE/ LE&UE)  | <b>F:</b> 3d/w for 16w<br><b>I:</b> Endurance: 40-70% of max wattage, Strength: 2sets, 10 reps/set<br><b>T:</b> 20-40min/d + strength ex.<br><b>T:</b> Aerobic & strength training (same aerobic program & progressively increasing strength-training) | <b>F:</b> 3d/w for 16w<br><b>I:</b> 40-70% of max wattage<br><b>T:</b> 20-40min/d<br><b>T:</b> Aerobic training only (UE&LE body ergometer)                          | VO <sub>2</sub> max (stress test) <b>+</b><br>Muscle strength (Biodex strength assessment): knee flexion, knee extension <b>0</b> , shoulder extension&flexion <b>+</b><br>Blood lipid panel (cholesterol <b>+</b> , glucose <b>0</b> , lipids <b>0</b> )                                                                                                                                               |
|                          | Teixeira-Salmela (1999) <sup>[65]</sup> | n=13<br>(6/7)<br><br>(LE/LE)           | <b>F:</b> 3d/w for 10w<br><b>I:</b> Aerobic ex.: 50-70% HRR, Strength: 3sets, 10 reps/set, 50-80% 1RM<br><b>T:</b> 60-90min/d<br><b>T:</b> Graded walking& stepping or cycling& LE muscle strengthening                                                | <b>F:</b> nr<br><b>I:</b> nr<br><b>T:</b> nr<br><b>T:</b> No intervention for 10w, then the same 10-week program as intervention group                               | Comfortable gait speed (middle 22meters of 30meters) <b>+</b><br>Activity per day (AAS) <b>+</b><br>Quality of life (NHP) <b>+</b><br>Comfortable stair-climbing speed <b>+</b><br>Physical activity (HAP) <b>+</b><br>LE muscle strength (dynamometer) <b>+</b><br>LE spasticity of quadriceps (pendulum test) <b>0</b> & ankle PF (controlled resistance to passive stretch) <b>0</b>                 |

## Additional file 1: Characteristics of included RCTs

**Legend:** + = significant between-group difference / 0 = non-significant difference between groups / both in favor of intervention group.

AAP = Adelaide Activities Profile, ABAW = aggressive bracing assisted walking, ABCS = Activity-Specific Balance Confidence Scale, ADL = Activities of Daily Living, (A-L) = antero-posterior, BBS = Berg Balance Scale, BF = biceps femoris, BI = Barthel Index, BMI = Body Mass Index, BWS = body weight support, BWSTT = body weight supported treadmill training, CKC = closed kinetic chain, CMSA = Chedoke-McMaster Stroke Assessment, CON = concentric, CRS = Cardiac Risk Score, d = days, DF = dorsiflexion, ECC = eccentric, EMG = electromyography, ESES = Ewart's Self Efficacy Scale, ex. = exercise, FAI = Frenchay Activities Index, FAME = Fitness and Mobility Exercises, FIM = Functional Independence Measure, FMMA = Fugl-Meyer Motor Assessment, fMRI = functional Magnet Resonance Imaging, GC = gastrocnemius, GDS = Geriatric Depression Scale, HADS = Hospital Anxiety and Depression Scale, HAP = Human Activity Profile, Hfmax = maximal heart rate, HR = heart rate, HRR = Heart Rate Reserve, HRQoL = Health Related Quality of Life, LE = lower extremity, LLFDI = Late Life Function and Disability Instrument, LS-IADL = Lawton Scale of Instrumental Activities of Daily Living, LT = locomotor training, MAS = Motor Assessment Scale, MASc = Modified Ashworth Scale, max = maximum, min = minutes, minWT = minute walking test, (M-L) = medio-lateral, MSC = Mental Health Component Summary Score, MWT = meter walking test, NE-ADL = Nottingham Extended Activities of Daily Living, NPR = Nottingham Power Rig, nr = not reported, OKC = open kinetic chain, PADS = Physical Activity and Disability Scale, PASIPD = Physical Activity for Individuals with Physical Disability, PBWSTT = Partial body weight supported treadmill training, PCI = Physiological Cost Index, PF = plantar flexion, PF10 = Physical Functioning Subscale, PGIC = Patient Global Impression of Change, PNF = Proprioceptive Neuromuscular Facilitation Patterns, PO = power output, PPA = Physiological Profile Assessment, PROM = Passive Range of Motion, PRT = Progressive resistance training, PT = Physical Therapy, reps = repetitions, RF = rectus femoris, (1)RM = (One) Repetition Maximum, RMI = Rivermead Mobility Index, RPE = Borg Rate of Perceived Exertion, SF = Short Form, SF36 = 36-item Short-Form Health Survey, SIS = Stroke Impact Scale, ST = semitendinosus, STREAM = Stroke Rehabilitation Assessment of Movement, TA = tibialis anterior, TAEX = Aerobic Treadmill Exercise, TUG = Timed up and go test, UE = upper extremity, ur = unclear reporting, VM = vastus medialis,  $VO_2$  = oxygen consumption, w = weeks, WIQ = Walking Impairment Questionnaire, WMFT = Wolf Motor Function Test, FES = Functional Electric Stimulation.
