# Supplementary material for: Application of principles of exercise training in sub-acute and chronic stroke survivors: a systematic review
Source: Springer Nature journal article supplement (doi:10.1186/s12883-014-0167-2), 2014-08-20
Supplement: MOESM2 [file 9742034]

## Additional file 2: Table S1 Application of Principles of Exercise Training

a: Aerobic exercise only (n=18)

|                                | Study ID                        | Specificity | Progression | Overload | Initial values | Reversibility | Diminishing returns |
|--------------------------------|---------------------------------|-------------|-------------|----------|----------------|---------------|---------------------|
| sub-acute stroke survivors     | Barbeau (2003) <sup>[29]</sup>  | ?           | ?           | -        | +              | +             | -                   |
|                                | Kosak (2000) <sup>[30]</sup>    | +           | ?           | -        | +              | -             | +                   |
|                                | Visintin (1998) <sup>[31]</sup> | ?           | ?           | -        | +              | +             | -                   |
| both                           | Mayo (2013) <sup>[45]</sup>     | +           | ?           | -        | +              | -             | -                   |
|                                | Dean (2012) <sup>[42]</sup>     | +           | ?           | -        | -              | -             | -                   |
| chronic stroke survivors       | Bang (2013) <sup>[40]</sup>     | +           | +           | +        | +              | -             | -                   |
|                                | Carda (2013) <sup>[41]</sup>    | +           | +           | ?        | +              | +             | -                   |
|                                | Jin (2013) <sup>[43]</sup>      | +           | +           | +        | +              | -             | -                   |
|                                | Tang (2013) <sup>[46]</sup>     | +           | +           | +        | +              | -             | -                   |
|                                | Globas (2012) <sup>[32]</sup>   | +           | +           | +        | +              | +             | +                   |
|                                | Jin (2012) <sup>[44]</sup>      | +           | +           | +        | +              | -             | -                   |
|                                | Moore (2010) <sup>[33]</sup>    | ?           | +           | -        | ?              | +             | -                   |
|                                | Quaney (2009) <sup>[34]</sup>   | +           | +           | +        | -              | +             | -                   |
|                                | Lennon (2008) <sup>[35]</sup>   | +           | +           | +        | -              | -             | -                   |
|                                | Luft (2008) <sup>[36]</sup>     | +           | +           | +        | -              | -             | +                   |
|                                | Macko (2005) <sup>[37]</sup>    | +           | +           | +        | -              | -             | +                   |
|                                | Peurala (2005) <sup>[38]</sup>  | +           | +           | ?        | ?              | +             | -                   |
| Potempa (1995) <sup>[39]</sup> | +                               | +           | +           | -        | -              | -             |                     |

## Additional file 2: Table S1 Application of Principles of Exercise Training

b: Resistance exercise only (n=8)

|                          | Study ID                          | Specificity | Progression | Overload | Initial values | Reversibility | Diminishing returns |
|--------------------------|-----------------------------------|-------------|-------------|----------|----------------|---------------|---------------------|
| chronic stroke survivors | Clark (2013) <sup>[52]</sup>      | +           | +           | ?        | ?              | -             | ?                   |
|                          | Lee (2013) <sup>[53]</sup>        | +           | +           | +        | +              | -             | -                   |
|                          | Waldman (2013) <sup>[54]</sup>    | +           | -           | -        | ?              | +             | -                   |
|                          | Flansbjerg (2008) <sup>[47]</sup> | +           | +           | +        | +              | +             | -                   |
|                          | Yang (2006) <sup>[48]</sup>       | +           | ?           | -        | -              | -             | -                   |
|                          | Ouellette (2004) <sup>[49]</sup>  | +           | +           | +        | -              | -             | -                   |
|                          | Kim (2001) <sup>[50]</sup>        | +           | -           | -        | -              | -             | -                   |
|                          | Dean (2000) <sup>[51]</sup>       | +           | +           | -        | -              | +             | -                   |

## Additional file 2: Table S1 Application of Principles of Exercise Training

c: Aerobic and resistance exercises (n=11)

|                            | Study ID                                | Specificity | Progression | Overload | Initial values | Reversibility | Diminishing returns |
|----------------------------|-----------------------------------------|-------------|-------------|----------|----------------|---------------|---------------------|
| sub-acute stroke survivors | Duncan (2003) <sup>[55]</sup>           | +           | +           | -        | -              | -             | -                   |
|                            | Duncan (1998) <sup>[56]</sup>           | +           | +           | -        | -              | -             | -                   |
| both                       | Salbach (2004) <sup>[57]</sup>          | ?           | ?           | ?        | +              | -             | -                   |
| chronic stroke survivors   | Lee (2010) <sup>[58]</sup>              | +           | +           | +        | -              | -             | +                   |
|                            | Lee (2008) <sup>[59]</sup>              | +           | +           | +        | -              | -             | -                   |
|                            | Pang (2008) <sup>[60]</sup>             | +           | +           | +        | +              | -             | -                   |
|                            | Mead (2007) <sup>[61]</sup>             | +           | +           | -        | -              | +             | -                   |
|                            | Olney (2006) <sup>[62]</sup>            | +           | +           | ?        | -              | +             | -                   |
|                            | Pang (2005) <sup>[63]</sup>             | +           | +           | +        | -              | -             | -                   |
|                            | Carr (2003) <sup>[64]</sup>             | +           | +           | +        | -              | -             | -                   |
|                            | Teixeira-Salmela (1999) <sup>[65]</sup> | +           | +           | -        | -              | -             | -                   |

Legend:

|   |                                       |
|---|---------------------------------------|
| + | Application of principle              |
| - | Principle not reported                |
| ? | Unclear use or inconsistently applied |
