# Supplementary material for: Application of principles of exercise training in sub-acute and chronic stroke survivors: a systematic review
Source: Springer Nature journal article supplement (doi:10.1186/s12883-014-0167-2), 2014-08-20
Supplement: MOESM3 [file 9742034]

### Additional file 3: Table S2 Rating of risk of bias in individual studies

a: Aerobic exercise only (n=18)

|                            | Study ID                        | Random sequence generation<br>(selection bias) | Allocation concealment<br>(selection bias) | Blinding of participants and<br>personnel<br>(performance bias) | Blinding of outcome<br>assessment<br>(detection bias) | Incomplete outcome data<br>(attrition bias) | Selective reporting<br>(reporting bias) |
|----------------------------|---------------------------------|------------------------------------------------|--------------------------------------------|-----------------------------------------------------------------|-------------------------------------------------------|---------------------------------------------|-----------------------------------------|
| sub-acute stroke survivors | Barbeau (2003) <sup>[29]</sup>  | ?                                              | ?                                          | ?                                                               | +                                                     | -                                           | +                                       |
|                            | Kosak (2000) <sup>[30]</sup>    | ?                                              | ?                                          | ?                                                               | ?                                                     | -                                           | +                                       |
|                            | Visintin (1998) <sup>[31]</sup> | ?                                              | ?                                          | ?                                                               | +                                                     | -                                           | +                                       |
| both                       | Mayo (2013) <sup>[45]</sup>     | +                                              | +                                          | -                                                               | +                                                     | -                                           | +                                       |
|                            | Dean (2012) <sup>[42]</sup>     | +                                              | +                                          | -                                                               | +                                                     | +                                           | +                                       |
| chronic stroke survivors   | Bang (2013) <sup>[40]</sup>     | +                                              | +                                          | +                                                               | +                                                     | +                                           | +                                       |
|                            | Carda (2013) <sup>[41]</sup>    | +                                              | +                                          | -                                                               | -                                                     | +                                           | +                                       |
|                            | Jin (2013) <sup>[43]</sup>      | ?                                              | +                                          | ?                                                               | ?                                                     | ?                                           | +                                       |
|                            | Tang (2013) <sup>[46]</sup>     | +                                              | +                                          | ?                                                               | +                                                     | +                                           | +                                       |
|                            | Globas (2012) <sup>[32]</sup>   | +                                              | +                                          | ?                                                               | +                                                     | +                                           | +                                       |
|                            | Jin (2012) <sup>[44]</sup>      | ?                                              | +                                          | ?                                                               | ?                                                     | ?                                           | +                                       |
|                            | Moore (2010) <sup>[33]</sup>    | +                                              | +                                          | ?                                                               | ?                                                     | -                                           | +                                       |
|                            | Quaney (2009) <sup>[34]</sup>   | ?                                              | ?                                          | ?                                                               | +                                                     | +                                           | +                                       |
|                            | Lennon (2008) <sup>[35]</sup>   | +                                              | +                                          | ?                                                               | +                                                     | +                                           | +                                       |
|                            | Luft (2008) <sup>[36]</sup>     | +                                              | ?                                          | ?                                                               | +                                                     | -                                           | +                                       |
|                            | Macko (2005) <sup>[37]</sup>    | +                                              | ?                                          | ?                                                               | -                                                     | -                                           | +                                       |
|                            | Peurala (2005) <sup>[38]</sup>  | +                                              | +                                          | ?                                                               | ?                                                     | -                                           | +                                       |
|                            | Potempa (1995) <sup>[39]</sup>  | ?                                              | ?                                          | ?                                                               | ?                                                     | ?                                           | +                                       |

### Additional file 3: Table S2 Rating of risk of bias in individual studies

b: Resistance exercise only (n=8)

|                          | Study ID                          | Random sequence generation<br>(selection bias) | Allocation concealment<br>(selection bias) | Blinding of participants and<br>personnel<br>(performance bias) | Blinding of outcome assessment<br>(detection bias) | Incomplete outcome data<br>(attrition bias) | Selective reporting<br>(reporting bias) |
|--------------------------|-----------------------------------|------------------------------------------------|--------------------------------------------|-----------------------------------------------------------------|----------------------------------------------------|---------------------------------------------|-----------------------------------------|
| chronic stroke survivors | Clark (2013) <sup>[52]</sup>      | ?                                              | ?                                          | ?                                                               | +                                                  | +                                           | +                                       |
|                          | Lee (2013) <sup>[53]</sup>        | -                                              | ?                                          | ?                                                               | ?                                                  | ?                                           | +                                       |
|                          | Waldman (2013) <sup>[54]</sup>    | -                                              | ?                                          | ?                                                               | ?                                                  | +                                           | +                                       |
|                          | Flansbjerg (2008) <sup>[47]</sup> | ?                                              | ?                                          | -                                                               | -                                                  | +                                           | +                                       |
|                          | Yang (2006) <sup>[48]</sup>       | +                                              | +                                          | ?                                                               | +                                                  | +                                           | +                                       |
|                          | Ouellette (2004) <sup>[49]</sup>  | ?                                              | ?                                          | ?                                                               | +                                                  | +                                           | +                                       |
|                          | Kim (2001) <sup>[50]</sup>        | ?                                              | +                                          | ?                                                               | +                                                  | +                                           | +                                       |
|                          | Dean (2000) <sup>[51]</sup>       | +                                              | +                                          | ?                                                               | ?                                                  | -                                           | +                                       |

### Additional file 3: Table S2 Rating of risk of bias in individual studies

c: Aerobic and resistance exercises (n=11)

|                            | Study ID                                | Random sequence generation<br>(selection bias) | Allocation concealment<br>(selection bias) | Blinding of participants and<br>personnel<br>(performance bias) | Blinding of outcome assessment<br>(detection bias) | Incomplete outcome data<br>(attrition bias) | Selective reporting<br>(reporting bias) |
|----------------------------|-----------------------------------------|------------------------------------------------|--------------------------------------------|-----------------------------------------------------------------|----------------------------------------------------|---------------------------------------------|-----------------------------------------|
| sub-acute stroke survivors | Duncan (2003) <sup>[55]</sup>           | +                                              | ?                                          | ?                                                               | +                                                  | +                                           | +                                       |
|                            | Duncan (1998) <sup>[56]</sup>           | +                                              | +                                          | ?                                                               | ?                                                  | +                                           | +                                       |
| both                       | Salbach (2004) <sup>[57]</sup>          | +                                              | +                                          | ?                                                               | +                                                  | +                                           | +                                       |
| chronic stroke survivors   | Lee (2010) <sup>[58]</sup>              | +                                              | ?                                          | ?                                                               | -                                                  | -                                           | +                                       |
|                            | Lee (2008) <sup>[59]</sup>              | +                                              | ?                                          | ?                                                               | -                                                  | +                                           | +                                       |
|                            | Pang (2008) <sup>[60]</sup>             | +                                              | ?                                          | ?                                                               | +                                                  | -                                           | +                                       |
|                            | Mead (2007) <sup>[61]</sup>             | +                                              | +                                          | -                                                               | +                                                  | +                                           | +                                       |
|                            | Olney (2006) <sup>[62]</sup>            | +                                              | +                                          | ?                                                               | -                                                  | +                                           | +                                       |
|                            | Pang (2005) <sup>[63]</sup>             | +                                              | +                                          | -                                                               | +                                                  | +                                           | +                                       |
|                            | Carr (2003) <sup>[64]</sup>             | ?                                              | ?                                          | ?                                                               | ?                                                  | -                                           | +                                       |
|                            | Teixeira-Salmela (1999) <sup>[65]</sup> | ?                                              | ?                                          | ?                                                               | ?                                                  | +                                           | +                                       |

Legend:

|   |              |
|---|--------------|
| + | Low risk     |
| - | High risk    |
| ? | Unclear risk |

**Additional file 3: Table S2** Rating of risk of bias in individual studies
